# Supplementary material for: Contributions of γ-Aminobutyric Acid (GABA) Receptors for the Activities of Pectis brevipedunculata Essential Oil against Drosophila suzukii and Pollinator Bees
Source: MDPI journal article supplement (doi:10.3390/plants13101392), 2024-05-17
Supplement: s1 [file s1]

## Supplementary Materials

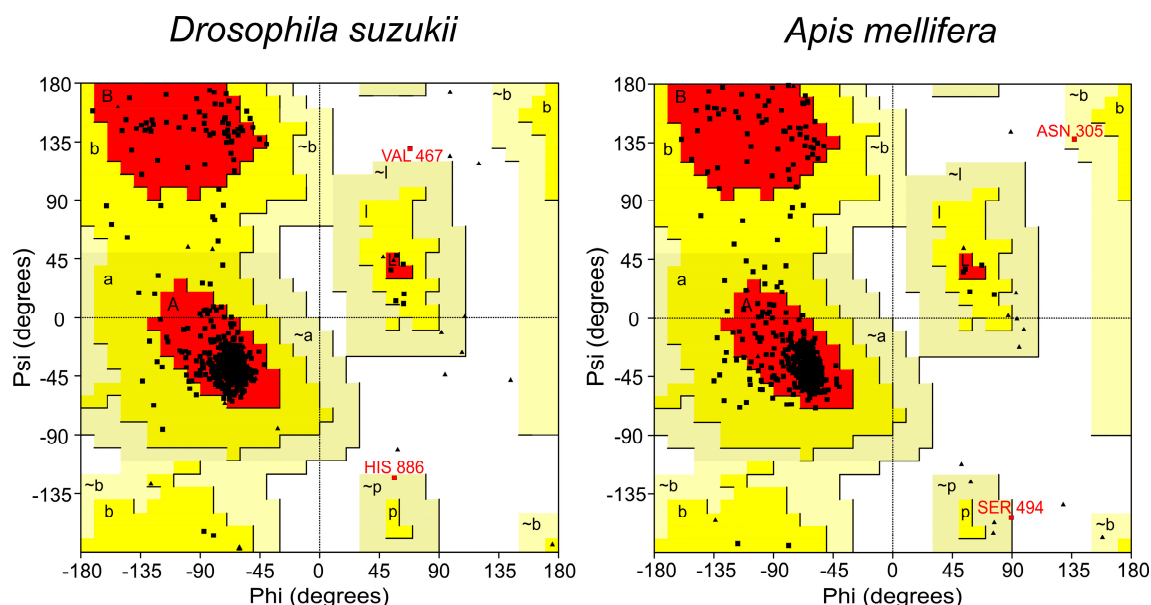

**Figure S1.** The Ramachandran plot of the GABA protein models. Based on an analysis of 118 structures of resolution of at least 2.0 Angstroms and R-factor no greater than 20%, a good quality model would be expected to have over 90% in the most favoured regions. Residues in most favoured regions [A,B,L]: *Drosophila suzukii* (425 – 92.2% ), *Apis mellifera* (420 – 89.9 %); Residues in additional allowed regions [a,b,l,p]: *D. suzukii* (34 – 7.4 %), *A. mellifera* (45 – 9.6 %); Residues in generously allowed regions [ $\sim$ a, $\sim$ b, $\sim$ l, $\sim$ p]: *D. suzukii* (1 – 0.2 %), *A. mellifera* (2 – 0.4 %); Residues in disallowed regions: *D. suzukii* (1 – 0.2 %), *A. mellifera* (0 – 0.0 %); Number of non-glycine and non-proline residues: *D. suzukii* (461 – 100.0 %), *A. mellifera* (467 – 100.0 %); Number of end-residues (excl. Gly and Pro): *D. suzukii* (5), *A. mellifera* (4); Number of glycine residues (shown as triangles): *D. suzukii* (40), *A. mellifera* (35); Number of proline residues: *D. suzukii* (24), *A. mellifera* (24); Total number of residues: *D. suzukii* (530), *A. mellifera* (530)

# Binding of fipronil into GABA receptor proteins of *Drosophila suzukii* and *Apis mellifera*

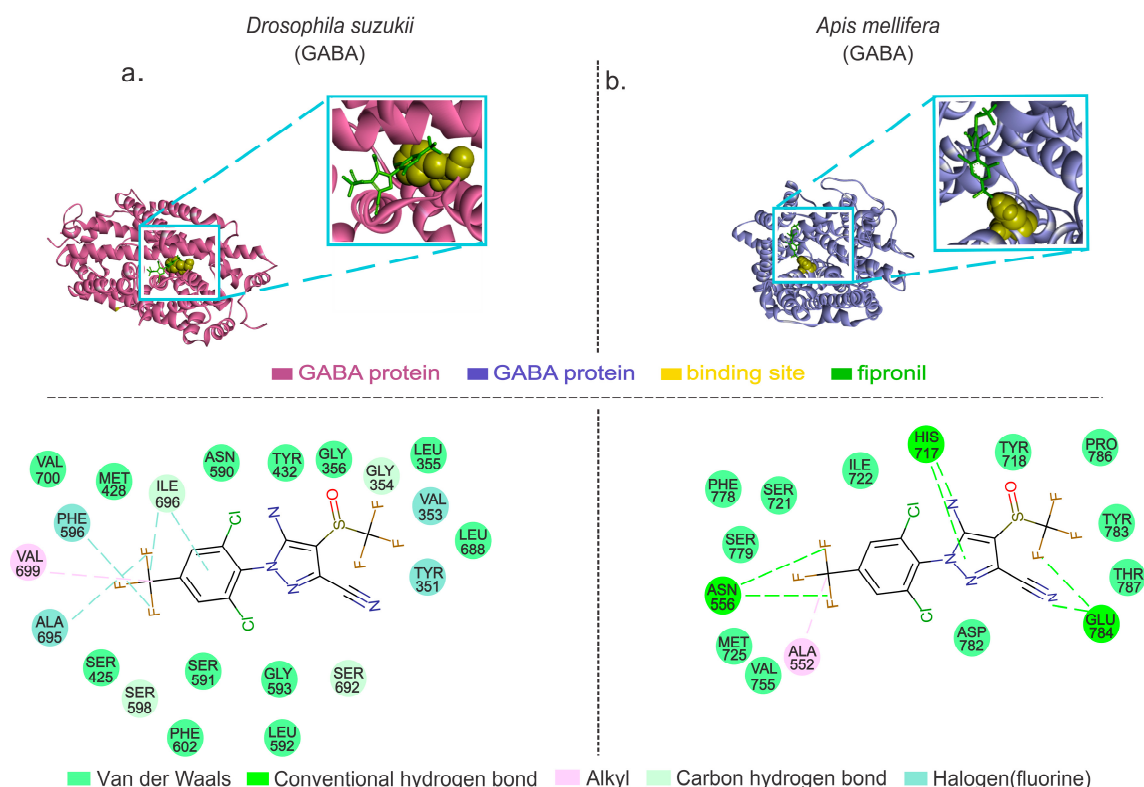

**Figure S2.** Fipronil interacting with GABA receptors of *Drosophila suzukii* and *Apis mellifera*. (a) Protein 3D structure of the *D. suzukii* GABA receptors with fipronil. (b) Protein 3D structure of the *A. mellifera* GABA receptors with fipronil. (c) 2D interaction maps showing the molecular interactions between amino acids from the binding site environments of *D. suzukii* GABA receptors with fipronil. (d) 2D interaction maps showing the molecular interactions between amino acids from the binding site environments of *A. mellifera* GABA receptors with fipronil.

# Binding of citral isomers into acetylcholinesterase of *Drosophila suzukii* and *Apis mellifera*

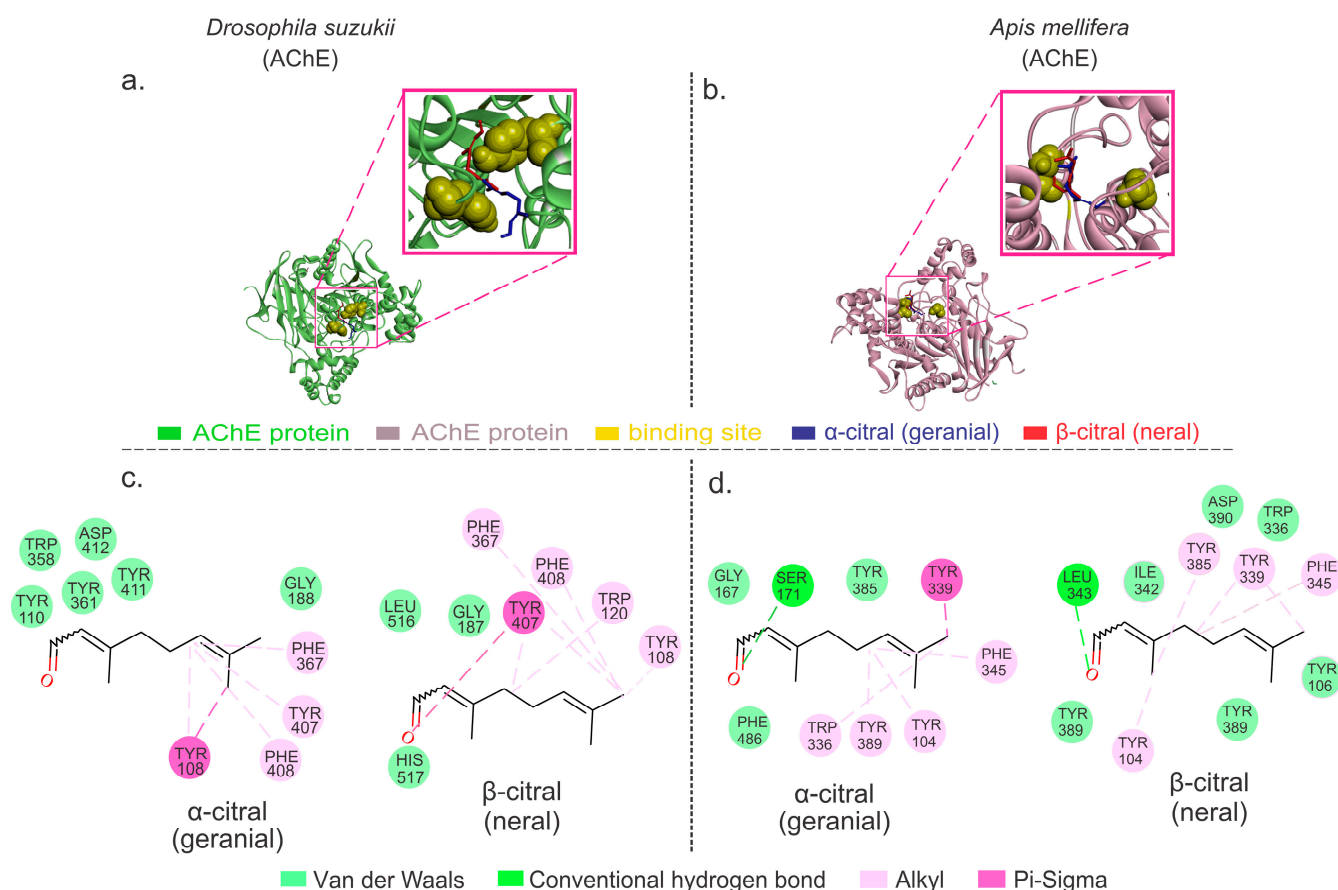

**Figure S3.** Citral isomers interacting with AChE protein from *Drosophila suzukii* and *Apis mellifera*. (a) Protein 3D structure of the *D. suzukii* AChE protein with the citral isomers. (b) Protein 3D structure of the *A. mellifera* AChE protein with the citral isomers. (c) 2D interaction maps showing the molecular interactions between amino acids from the binding site environments of *D. suzukii* AChE protein with the citral isomers. (d) 2D interaction maps showing the molecular interactions between amino acids from the binding site environments of *A. mellifera* AChE protein with the citral isomers

# Binding of citral isomers into glutathioneS-transferase of *Drosophila suzukii* and *Apis mellifera*

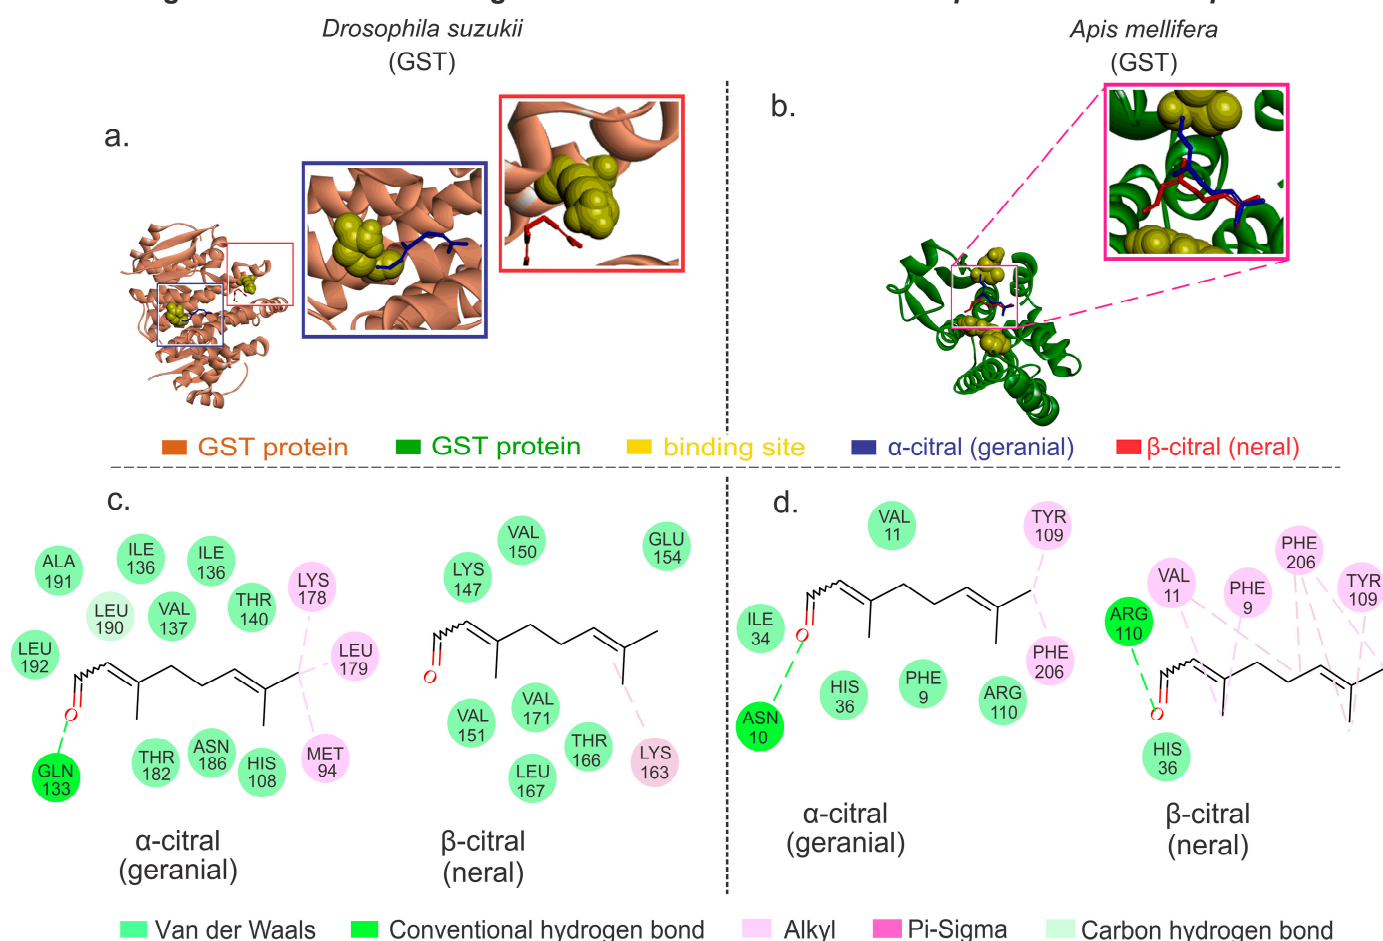

**Figure S4.** Citral isomers interacting with GST protein from *Drosophila suzukii* and *Apis mellifera*. (a) Protein 3D structure of the *D. suzukii* GST protein with the citral isomers. (b) Protein 3D structure of the *A. mellifera* GST protein with the citral isomers. (c) 2D interaction maps showing the molecular interactions between amino acids from the binding site environments of *D. suzukii* GST protein with the citral isomers. (d) 2D interaction maps showing the molecular interactions between amino acids from the binding site environments of *A. mellifera* GST protein with the citral isomers

**Table S1** The coordinates of the receptor grids on the targets

| $\gamma$ -aminobutyric acid (GABA) receptor |        |        |                 |        |        |            |       |        |                       |        |        |                 |        |        |            |        |        |
|---------------------------------------------|--------|--------|-----------------|--------|--------|------------|-------|--------|-----------------------|--------|--------|-----------------|--------|--------|------------|--------|--------|
| <i>Drosophila suzukii</i>                   |        |        |                 |        |        |            |       |        | <i>Apis mellifera</i> |        |        |                 |        |        |            |        |        |
| $\alpha$ -citral                            |        |        | $\beta$ -citral |        |        | Fipronil   |       |        | $\alpha$ -citral      |        |        | $\beta$ -citral |        |        | Fipronil   |        |        |
| 124.039                                     | 6.693  | 42.925 | 124.039         | 6.693  | 42.925 | 124.039    | 6.693 | 42.925 | -42.346               | -0.589 | 54.926 | -42.346         | -0.589 | 54.926 | -42.346    | -0.589 | 54.926 |
| Acetylcholinesterase (AChE)                 |        |        |                 |        |        |            |       |        |                       |        |        |                 |        |        |            |        |        |
| <i>Drosophila suzukii</i>                   |        |        |                 |        |        |            |       |        | <i>Apis mellifera</i> |        |        |                 |        |        |            |        |        |
| $\alpha$ -citral                            |        |        | $\beta$ -citral |        |        | Fipronil   |       |        | $\alpha$ -citral      |        |        | $\beta$ -citral |        |        | Fipronil   |        |        |
| 24.426                                      | 63.184 | 9.919  | 24.426          | 63.184 | 9.919  | <i>n.a</i> |       |        | 24.326                | 63.259 | 10.076 | 24.326          | 63.259 | 10.076 | <i>n.a</i> |        |        |
| Glutathione-S-transferase (GST)             |        |        |                 |        |        |            |       |        |                       |        |        |                 |        |        |            |        |        |
| <i>Drosophila suzukii</i>                   |        |        |                 |        |        |            |       |        | <i>Apis mellifera</i> |        |        |                 |        |        |            |        |        |
| $\alpha$ -citral                            |        |        | $\beta$ -citral |        |        | Fipronil   |       |        | $\alpha$ -citral      |        |        | $\beta$ -citral |        |        | Fipronil   |        |        |
| 56.191                                      | 20.534 | 6.667  | 56.191          | 20.534 | 6.667  | <i>n.a</i> |       |        | -0.300                | 0.923  | -0.368 | -0.300          | 0.923  | -0.368 | <i>n.a</i> |        |        |

\*spacing 0.375; npts 40 40 40; *nt*- not applicable
